# Supplementary material for: Engineered MED12 mutations drive uterine fibroid-like transcriptional and metabolic programs by altering the 3D genome compartmentalization
Source: Research Square preprint supplement (doi:10.21203/rs.3.rs-2537075/v1), 2023-02-09
Supplement: Supplementary file 1 [file 0317f0524735e3d46c112545.xlsx]

## Sheet: Sheet1
		WT_hTERT_R1	WT_hTERT_R2	WT_hTERT_R3	WT_hTERT_R4	MED12(G44N)_R1	MED12(G44N)_R2	MED12(G44N)_R3	MED12(G44N)_R4
Total Ion Count	TIC	4.07549e+11	3.36432e+11	3.48558e+11	3.79574e+11	3.94502e+11	4.09209e+11	3.8569e+11	4.40241e+11
Peak area reported underneath were produced by extractions from same amount of starting materials according to protein amount. (NON-NORMALIZED DATA)
		WT_hTERT_R1	WT_hTERT_R2	WT_hTERT_R3	WT_hTERT_R4	MED12(G44N)_R1	MED12(G44N)_R2	MED12(G44N)_R3	MED12(G44N)_R4
	KEGG ID
1,3-bisphospho-D-glycerate	C00236	0	0	0	0	0	0	0	0
1-methylnicotinamide+	C02918	1.55891e+09	2.48686e+09	2.32644e+09	2.05465e+09	7.46378e+08	4.96533e+08	8.5513e+08	5.07007e+08
1-phenylethylamine	C02455	1.04929e+06	1.07235e+06	458712	1.30909e+06	1.10717e+06	445970	381456	1.09876e+06
2- / 3-phosphoglycerate	C00631 / C00197	6.40136e+06	9.83036e+06	1.03326e+07	9.41629e+06	9.75619e+06	1.18947e+07	8.70385e+06	1.45044e+07
2-(Formamido)-N1-(5-phospho-D-ribosyl)acetamidine	C04640	0	0	0	0	0	0	0	0
2,3-bisphospho-D-glycerate	C01159-C03339	5829.57	14612.7	28279.2	78637.2	121180	109552	311607	302482
2-aminobutanoate / 2-/3-aminoisobutanoate	C02261 / C03665 / C05145	1.67964e+07	1.37049e+07	1.12422e+07	1.47964e+07	1.81744e+07	2.3394e+07	2.30809e+07	1.96819e+07
2-HG	C02630	8.39046e+06	5.79218e+07	2.52816e+07	9.43896e+06	1.16814e+07	1.26374e+07	1.71084e+07	1.46408e+07
2-hydroxybutanoic acid	C05984	5.18784e+06	0	0	491861	863175	0	792028	0
2-keto-3-deoxy-d-gluconic acid	C01216	0	0	0	0	0	0	0	0
2-keto-isovaleric acid	C00141	6.32151e+07	6.21578e+07	5.05932e+07	6.02426e+07	9.35385e+07	1.20218e+08	1.01611e+08	1.15931e+08
2-ketovaleric acid	C06255	0	0	0	0	0	0	0	0
2-oxoadipic acid	C00322	1.38863e+06	764800	876776	923151	1.26608e+06	1.59289e+06	1.0297e+06	1.48337e+06
2-oxobutanoic acid	C00109	0	0	0	0	0	0	0	0
3- / 4-hydroxyphenylacetic acid	C05593 / C00642	1.19551e+06	788696	805758	312244	354206	296816	405568	298061
3- / 7-methylguanine	C02230 / C02242	116056	131850	74796.9	179465	239117	165901	233815	278650
3,4-dihydroxymandelic acid	C05580	0	0	0	0	0	0	0	0
3,4-dihydroxyphenylpropanoate	C10447	13046.2	27903.4	12980.6	0	28795.5	13649.1	25822.2	33056.8
3-hydroxy-anthranilic acid	C00632	0	0	0	0	0	0	0	0
3-hydroxybutanoic acid	C01089	0	0	0	0	0	0	0	0
3-hydroxykynurenine	C02794	233122	104919	0	0	404655	71880.8	261308	119597
3-hydroxypropanoic acid	C01013	0	0	0	0	0	0	0	0
3-methoxytyramine	C05587	0	0	0	0	0	0	0	0
3-methylcrotonyl-CoA	C03069	0	11988.7	0	0	0	0	14133.8	0
3-phosphohydroxypyruvic acid	C03232	400965	442270	335560	440714	773078	1.34696e+06	783421	1.16121e+06
3-phospho-serine	C01005	2.03864e+06	1.98389e+06	874362	0	130240	0	137944	0
3-ureidopropionic acid	C02642	378222	491415	334588	334148	420002	675184	390513	579568
4-hydroxybutanoic acid	C00989	0	0	4.27184e+06	0	7.76244e+06	845217	2.51271e+06	0
4-hydroxyphenylpyruvic acid	C01179	83103.8	79745.5	82351.8	0	0	0	0	0
4-hydroxyproline / 5-aminolevulinate	C01157 / C00430	2.08515e+07	9.81387e+06	1.28447e+07	2.01372e+07	1.88786e+07	3.96401e+07	1.15281e+07	4.23406e+07
5-aminopentanoic acid	C00431	3.26821e+06	4.01182e+06	0	4.78003e+06	1.28003e+07	3.6726e+06	0	2.16103e+06
5'-deoxyadenosine	C05198	0	22067.6	0	0	95625.9	0	0	0
5-HIAA	C05635	660254	664873	754373	790918	5.49353e+06	3.64353e+06	8.52914e+06	4.37223e+06
5-methylcytosine	C02376	380709	0	0	242511	0	246006	158959	218131
5-methyl-THF	C00440	0	0	0	0	0	0	0	0
5'-methylthioadenosine	C00170	709949	686951	815517	805517	540049	731993	454666	755486
6-aminohexanoate	C02378	0	0	0	0	0	0	0	0
6-O-methylguanine	n/a	0	0	0	0	38160.9	0	39470.3	0
6-phosphogluconic acid	C00345	284022	326050	226908	408876	219340	213763	309068	210469
6-phosphoglucono-D-lactone	C01236	0	0	0	0	0	0	0	0
acetoacetic acid	C00164	6.03777e+06	770235	0	386856	2.45929e+06	1.46422e+06	1.02431e+06	664201
acetoin -	C00466	17583	924888	1.01749e+06	517765	27823.7	21000.5	18620.2	15305.7
acetylcarnitine+	C02571	2.80048e+08	2.07094e+08	2.44361e+08	3.09675e+08	3.48816e+08	4.05442e+08	3.8431e+08	4.081e+08
acetylcholine+	C01996	2.32489e+06	1.98337e+06	2.39302e+06	2.45794e+06	5.19773e+06	4.20316e+06	5.59134e+06	5.83123e+06
acetyl-CoA	C00024	0	0	0	165323	0	0	0	0
aconitic acid	C00417-C02341	893545	978790	1.08086e+06	1.89305e+06	1.54431e+06	1.04998e+06	2.43363e+06	767630
acrylic acid	C00511	3.66497e+07	2.76405e+07	1.35731e+07	1.41461e+07	1.98555e+07	2.96396e+07	2.14822e+07	2.80187e+07
adenine	C00147	3.4305e+07	3.47618e+07	1.88585e+07	2.24215e+07	1.92502e+07	2.27535e+07	2.015e+07	4.8961e+07
adenosine	C00212	4.97788e+07	1.7578e+08	4.28479e+07	1.67644e+07	5.1097e+06	6.92177e+06	1.19508e+07	1.84372e+07
adenylosuccinate	C03794	0	13657.3	199558	503723	278511	658872	34015	667447
ADP / dGDP	C00008 / C00361	1.32587e+07	1.29811e+07	1.52386e+07	2.07901e+07	1.09953e+07	1.1033e+07	9.80303e+06	7.49224e+06
ADP-D-glucose	C00498	0	0	0	0	0	0	0	0
agmatine	C00179	117134	50752.6	58917.3	182277	175811	68289.2	137831	425634
AICA ribonucleotide	C04677	524953	170916	604328	690494	196004	476465	480657	589756
a-KG	C00026	7.74257e+07	5.96068e+07	6.61392e+07	7.8666e+07	9.96511e+07	1.05671e+08	1.49805e+08	1.32248e+08
alanine	C00041	7.9172e+07	1.62982e+06	1.33011e+07	1.83467e+08	1.37302e+08	2.30829e+08	9.58622e+07	1.67154e+08
alanine methyl ester	n/a	4.82783e+06	3.60897e+06	3.41519e+06	4.42663e+06	4.89704e+06	7.1384e+06	4.11361e+06	6.66976e+06
allantoin	C01551	2.3893e+06	2.59572e+06	1.8442e+06	2.76542e+06	3.00535e+06	4.48361e+06	3.26441e+06	4.57873e+06
AMP / dGMP	C00020 / C00362	921744	376828	269772	368113	499115	833202	318633	564095
anandamide	C11695	0	0	0	0	0	0	0	0
arginine	C02385	1.75387e+09	1.33432e+09	1.25574e+09	1.43133e+09	1.70717e+09	2.08361e+09	1.90882e+09	2.05857e+09
ascorbic acid	C00072	0	33011.2	0	25157.4	0	0	113872	26432.5
asparagine	C16438	3.09988e+07	4.81762e+07	4.89974e+07	4.11815e+07	2.62272e+07	3.09992e+07	3.29785e+07	3.11043e+07
aspartic acid	C16433	1.00733e+08	1.22101e+08	1.25801e+08	1.04502e+08	7.21888e+07	9.08378e+07	8.82073e+07	9.49209e+07
ATP / dGTP	C00002 / C00286	2.99264e+08	2.23944e+08	2.78916e+08	3.26467e+08	2.70714e+08	3.19063e+08	3.10439e+08	3.64331e+08
b-alanine	C00099	3.07741e+07	4.94093e+07	4.01173e+07	4.22869e+07	4.73913e+07	4.52548e+07	3.42099e+07	5.61228e+07
betaine+	C00719	3.1474e+08	4.0461e+08	3.89653e+08	2.17161e+08	3.94621e+08	5.99697e+08	3.22191e+08	3.2222e+08
bilirubin	C00486	0	0	0	0	0	0	0	0
biotin	C00120	95573.6	27106.7	34641.1	0	70709.9	0	0	0
butyric acid / (iso)	C00246 / C02632	1.87344e+06	1.88017e+06	977929	943940	1.50986e+06	2.15124e+06	2.24419e+06	1.6527e+06
caffeic acid	C01197/C01481	0	0	0	0	0	0	0	0
cAMP(2',3') / cAMP(3',5')	C02353 / C00575	0	38505.2	35525.5	21454.9	0	0	0	0
carbamoyl phosphate	C00169	178731	0	0	166727	0	0	528055	0
carnitine+	C00487	2.5089e+08	5.37669e+08	5.78676e+08	4.47213e+08	1.75734e+08	3.64164e+07	3.88966e+08	3.66292e+07
cCMP(2',3'-)	C02354	4.69945e+06	6.19941e+06	7.01808e+06	8.88906e+06	8.52656e+06	1.19342e+07	9.54154e+06	1.4117e+07
CDP	C00112	3.00669e+06	4.17225e+06	6.59162e+06	8.34135e+06	4.75759e+06	7.77684e+06	6.32489e+06	5.648e+06
CDP-choline+	C00307	0	0	0	0	0	0	0	0
cGMP	C00943	0	0	0	0	0	0	0	0
choline+	C00114	9.68344e+07	1.62635e+08	1.57463e+08	1.9081e+08	1.3546e+08	1.11539e+08	9.54707e+07	1.09473e+08
citraconic acid	C02226	1.17684e+06	1.90217e+06	1.44495e+06	1.04235e+06	409163	804645	526605	1.43747e+06
citramalic acid	C00815	1.10248e+06	1.39193e+06	2.52108e+06	1.62011e+06	963711	1.21569e+06	1.95882e+06	1.25838e+06
citrate / citrate(iso)	C00158 / C00311	1.08181e+08	4.55957e+08	4.25171e+08	1.82532e+08	1.62963e+08	1.8436e+08	4.51101e+08	4.65582e+08
citrulline	C00327	0	555713	238299	0	281480	0	364724	167488
CMP	C00055	0	13245.1	8671.7	22433.6	21161.7	0	0	0
coenzyme A	C00010	0	0	0	0	0	0	0	0
cortisol	C00735	0	0	0	0	0	0	9884.18	0
creatine	C00300	1.30583e+09	2.20581e+09	2.2623e+09	1.84036e+09	1.06627e+09	4.97079e+08	1.75027e+09	5.26299e+08
creatinine	C00791	7.6883e+07	1.01404e+08	4.98728e+07	9.87973e+07	1.0364e+08	6.54197e+07	1.11891e+08	1.34287e+08
CTP	C00063	2.32269e+07	1.86713e+07	2.35889e+07	3.80217e+07	3.26286e+07	4.07065e+07	4.38069e+07	5.36946e+07
cystathionine	C00542	1.48984e+07	1.17251e+07	1.5154e+07	1.85713e+07	2.35202e+07	3.12113e+07	3.00674e+07	3.23944e+07
cysteine	C00736-C00097	2.91669e+06	2.09047e+06	2.76863e+06	5.21579e+06	6.83154e+06	7.44841e+06	4.19376e+06	6.69925e+06
cysteine-S-sulfate	C05824	0	0	0	0	0	0	0	0
cystine	C01420	1.63992e+06	464145	336032	391962	640123	610746	137044	68112.8
cytidine	C00475	93328.5	0	15418.8	73671.8	87417.4	31532.4	27838.2	30845.9
cytosine	C00380	280301	173241	179881	1.23628e+06	125589	157709	52240.1	193900
dADP	C00206	0	0	0	0	0	0	0	0
dAMP	C00360	0	0	0	92866.4	326886	0	140403	0
D-arabinono-1,4-lactone	C00652	1.48738e+06	2.08833e+06	521753	890577	2.4542e+06	3.16632e+06	0	1.06544e+06
dATP	C00131	1.41708e+06	877562	1.21101e+06	1.44325e+06	1.19131e+06	1.37945e+06	1.44782e+06	1.44594e+06
dCDP	C00705	0	0	0	0	0	0	0	0
dCMP	C00239	0	0	0	0	0	0	0	0
dCTP	C00458	898157	609884	736584	821076	994357	1.0133e+06	1.26651e+06	1.40519e+06
dehydroascorbic acid	C05422	0	0	0	0	0	0	0	0
deoxyadenosine	C00559	223104	598523	419971	0	22379.2	72991	0	87986.1
deoxycarnitine+	C01181	3.91131e+06	8.01512e+06	1.05562e+07	1.625e+07	4.70766e+06	3.40382e+06	1.10728e+07	3.2881e+06
deoxycytidine	C00881	0	0	0	0	0	0	0	0
deoxyguanosine	C00330	439042	640346	251003	942918	1.21708e+06	30964.7	1.1959e+06	1.37752e+06
deoxyinosine	C05512	7498.67	22958.1	19437.4	62339.5	18960.2	23303.5	40623.2	54484.4
deoxyuridine	C00526	257620	123731	147770	207584	262439	261593	155373	342840
D-erythrose-4-phosphate	C00279	0	0	0	0	0	0	0	0
D-galactonic acid / D-gluconic acid	C00880 / C00257	2.69251e+07	3.21257e+07	3.16297e+07	3.75428e+07	2.74086e+07	3.48425e+07	3.61375e+07	3.35196e+07
D-galactosamine/glucosamine-1/6-phosphate	C03783 / C00352 / C06377 / C06156	0	0	0	0	0	0	15293.1	0
D-glucuronolactone / D-galacturonolactone	C02670 / D06430	3.21392e+06	2.94531e+06	3.02506e+06	4.34152e+06	3.16967e+06	3.26705e+06	4.77773e+06	4.90327e+06
dihydroorotate	C00337	3.68473e+06	1.94477e+06	1.70521e+06	2.71307e+06	2.81284e+06	4.00253e+06	5.8215e+06	2.78304e+06
dimethylglycine	C01026	0	78513.1	0	121730	0	0	0	158657
DL-DOPA	C00355	18052.1	7487.2	0	7863.39	0	13093.1	7246.14	0
DOPAC	C01161	0	7620.26	16488.2	20738.2	17268.3	19029.9	9928.69	8798.68
dopamine	C03758	170344	677760	0	124080	389915	542008	340855	413363
D-ribose-1/5-phosphate / D-ribulose 5-phosphate	C00620 / C00117 / C00199	0	0	0	0	0	0	0	20105.6
D-sedoheptulose	C02076	108263	150756	87475.2	245768	182746	190349	246148	170780
D-sedoheptulose-7-phosphate	C05382	20009.2	0	0	31576.3	0	0	0	0
dTMP	C00364	0	17678.9	0	44614.4	39804.1	45261.2	0	48996.7
dTTP	C00459	645115	310891	558709	547951	572771	705742	674286	816134
dUMP	C00366	0	0	0	0	0	0	0	0
dUTP	C00460	0	0	0	0	0	0	0	0
epinephrine / normetanephrine	C00788 / C05589	3.2897e+06	1.5679e+06	1.9496e+06	2.85226e+06	3.29812e+06	2.42204e+06	3.19054e+06	2.127e+06
F-1,6/2,6-DP	C00354 / C00665	6.27437e+06	7.99318e+06	5.76686e+06	4.54811e+06	4.26815e+06	3.55791e+06	5.73014e+06	4.90556e+06
F1P	C01094	0	0	0	0	0	0	126481	0
F6P / G1P / G6P	C00085 / C00103 / C00092	2.65528e+06	2.10438e+06	1.82788e+06	1.84659e+06	1.44601e+06	1.7638e+06	1.63607e+06	1.96758e+06
FAD	C00016	71385.2	499315	437444	220822	0	0	214276	0
FMN	C00061	0	0	0	0	0	0	0	161594
folate	C00504	0	0	0	0	0	0	0	0
fructose / mannose	C00095 / C00159	2.11648e+07	2.17589e+07	1.32693e+07	1.16794e+07	1.68747e+07	2.06856e+07	1.45397e+07	1.82372e+07
fumaric acid	C00122	7.63504e+07	8.60154e+07	1.01404e+08	1.36739e+08	1.2328e+08	5.42431e+07	1.78901e+08	6.0184e+07
GABA	C00334	1.04995e+07	9.52366e+06	1.17427e+07	1.28642e+07	1.62143e+07	1.47946e+07	1.6483e+07	1.60399e+07
galactosamine / glucosamine / mannosamine	C02262 / C00329 / C03570	1.38222e+06	1.81878e+06	976068	886164	1.03537e+06	1.46662e+06	1.04827e+06	1.59634e+06
galactose / glucose	C00124 / C00267	4.38529e+08	4.15409e+08	1.95111e+08	1.6728e+08	2.14806e+08	3.43019e+08	2.07619e+08	3.41595e+08
GalNAC / GlcNAC	C01074 / C00140	44829.7	14524.2	24190.1	113372	122411	168308	31976.4	278086
GAP / DHAP	C00118 / C00111	8.19861e+06	7.63361e+06	7.92518e+06	5.30583e+06	1.12504e+07	8.25156e+06	1.08963e+07	1.30654e+07
GDP	C00035	4.40054e+06	4.6497e+06	7.06876e+06	9.63453e+06	5.03504e+06	7.10833e+06	7.72356e+06	8.34862e+06
GDP-L-fucose	C00325	0	0	0	0	0	0	0	0
geranyl-PP	C00341	0	0	0	0	0	0	0	0
glucono-lactone	C00198	0	0	0	0	0	0	0	0
glutaconic acid	C02214	0	0	0	0	0	0	0	0
glutamate	C00302	1.68109e+09	1.93336e+09	2.32294e+09	3.17257e+09	1.82778e+09	1.37776e+09	2.78625e+09	1.37327e+09
glutamine	C00303	8.82418e+08	9.26179e+08	9.61682e+08	1.11931e+09	8.29907e+08	4.28356e+08	9.47521e+08	4.6692e+08
glutathione	C00051	7.36289e+07	1.7782e+08	1.6977e+08	2.15786e+08	1.70913e+08	6.50619e+07	2.1183e+08	7.23173e+07
glutathione disulfide	C00127	8.85267e+07	6.44038e+07	7.41935e+07	7.92759e+07	7.50957e+07	1.02281e+08	8.05931e+07	9.80325e+07
glyceraldehyde	C02426	3.91925e+09	1.73749e+09	1.77238e+09	1.51199e+08	0	0	0	0
glyceric acid	C00258	1.07669e+07	7.66739e+06	7.54772e+06	1.01074e+07	1.38795e+07	2.25787e+07	7.5979e+06	1.326e+07
glycerol 2/3-phosphate	C02979 / C00093	2.13899e+06	967092	1.23338e+06	1.57067e+06	2.13502e+06	2.68224e+06	2.39432e+06	3.57496e+06
glycine	C00037	1.35312e+08	1.71424e+08	1.85408e+08	1.83955e+08	1.24036e+08	1.44197e+08	1.46129e+08	1.67228e+08
glycylglycine	C02037	1.81361e+06	3.06652e+06	2.67463e+06	2.58844e+06	2.26829e+06	2.94852e+06	2.38935e+06	3.03e+06
glyoxylic acid	C00048	0	0	0	0	0	0	0	0
GMP	C00144	0	12189.2	42979.2	177028	28904.8	65362.4	0	0
GTP	C00044	3.10518e+07	2.69262e+07	3.47386e+07	4.06415e+07	3.6571e+07	4.49732e+07	4.82861e+07	5.3403e+07
guanidine	C17349	9.10583e+06	2.97275e+07	2.42052e+07	2.57448e+07	1.01526e+07	2.08452e+06	1.78111e+07	2.47367e+06
guanidinoacetate	C00581	0	120721	17320.1	0	0	17814.5	0	0
guanine	C00242	17206.6	134978	171685	349274	0	77942.2	108362	123400
guanosine	C00387	7.4312e+06	4.64168e+06	4.87864e+06	5.75458e+06	2.63946e+06	4.67049e+06	2.76845e+06	4.92038e+06
gulonic-lactone	C01040	1.89053e+06	1.34044e+06	1.66645e+06	1.04371e+06	1.20863e+06	1.20167e+06	936759	1.18996e+06
histamine	C00388	0	0	0	0	0	0	0	0
histidine	C00768	1.87333e+08	2.02246e+08	1.87417e+08	1.78569e+08	1.45745e+08	1.45075e+08	1.54461e+08	1.4508e+08
homocysteine	C05330	0	93871.8	183361	132258	126017	136354	215670	103548
homocystine	C01817	0	0	0	0	0	0	0	0
homogentisic acid	C00544	60731	35585	38464.6	9220.17	18278.3	19841.9	9027.64	31419.1
homoserine / threonine / allothreonine	C00263 / C00188 / C05519	3.89106e+08	5.56589e+08	6.37712e+08	6.15557e+08	3.66832e+08	3.25423e+08	5.21495e+08	3.48575e+08
hydroxyphenyllactic acid / HVA	C03672 / C05582	958862	1.36773e+06	811535	1.53048e+06	1.47651e+06	1.0409e+06	1.82487e+06	1.97705e+06
hydroxypyruvic acid	C00168	155181	92019.6	291498	13915.1	169463	174330	35749.8	217186
hypoxanthine	C00262	499031	352948	236321	1.22113e+06	553998	456761	704088	574735
IDP	C00104	0	0	0	0	0	0	0	0
imidazole-4-acetate	C02835	2.52725e+06	1.81595e+06	1.90371e+06	1.87348e+06	1.8377e+06	2.89746e+06	2.23446e+06	3.04116e+06
IMP	C00130	0	0	0	0	0	0	0	0
inosine	C00294	7.0102e+06	922109	1.63279e+06	5.4186e+06	3.2596e+06	6.02363e+06	3.48981e+06	4.8795e+06
isonictinic acid	C07446	0	0	0	0	0	0	0	0
isopentenyl pyrophosphate	C00129	0	0	0	0	0	0	0	0
itaconic acid	C00490	0	0	0	0	0	0	0	0
kynurenic acid	C01717	12681.1	11426.5	0	24446.1	0	24545	13783	16791.2
kynurenine	C01718	8.60121e+06	8.93722e+06	1.02642e+07	1.22371e+07	7.23532e+07	4.59104e+07	1.14141e+08	5.90164e+07
lactic acid	C01432	1.00536e+10	1.06791e+10	1.15372e+10	8.03587e+09	1.28178e+10	1.29072e+10	1.02797e+10	1.33119e+10
lactose / maltose	C00243 / C00208	3.6315e+06	2.91822e+06	1.33239e+06	965147	2.42164e+06	2.68018e+06	2.28042e+06	2.9571e+06
L-arginino-succinate	C03406	5.16414e+06	4.00014e+06	4.55066e+06	5.44776e+06	6.92963e+06	3.47021e+06	7.27282e+06	1.38469e+06
L-cysteic acid	C00506	126569	123654	221122	307011	179539	25037.2	166527	207860
leucine / leucine(iso) / norleucine	C16439 / C16434 / C01933	2.20728e+09	1.97216e+09	2.168e+09	2.43756e+09	1.91326e+09	1.944e+09	2.33258e+09	1.95734e+09
levulinic acid	n/a	0	0	0	0	0	0	0	0
lipoamide	C00248	0	0	0	0	0	0	0	0
L-NMMA	C03884	5.48353e+06	4.48975e+06	4.54148e+06	5.42594e+06	6.28265e+06	8.37782e+06	7.18531e+06	8.34208e+06
L-tyrosine methyl ester	C03404	3.8424e+06	1.73816e+06	2.32547e+06	4.58106e+06	3.08734e+06	4.49612e+06	2.96205e+06	3.55183e+06
lysine	C00047/C00739	3.75924e+08	2.12568e+08	3.06616e+08	2.30096e+08	2.70607e+08	3.38977e+08	2.97293e+08	3.82954e+08
maleic acid	C01384	3.38893e+06	1.08866e+06	1.2164e+06	1.94734e+06	3.94822e+06	5.89427e+06	1.64596e+06	6.05584e+06
malic acid	C00711	6.5872e+07	9.97747e+07	1.33971e+08	2.99116e+08	9.69435e+07	8.49724e+07	3.62206e+08	9.77457e+07
malonic acid	C00383	0	0	0	0	0	0	0	0
malonyl-CoA	C00083	0	0	0	0	13141.2	0	0	17711.4
mandelic acid / vanillin	C01984 / C00755	0	0	0	0	0	0	0	0
ManNAC	C00645	54779.4	61181	45671.1	137142	146222	116613	92036.5	253691
mesaconic acid	C01732	2.86292e+06	6.44363e+06	3.45179e+06	4.12091e+06	2.39069e+06	2.15498e+06	4.40991e+06	2.33391e+06
methionine	C00073	3.27766e+08	2.2854e+08	2.54338e+08	3.11371e+08	2.97203e+08	3.99033e+08	3.61241e+08	4.09449e+08
methyl acetoacetate	n/a	0	0	2.13611e+06	0	0	0	0	0
methylglyoxal	C00546	4.88162e+06	0	2.80083e+06	1.98957e+06	922230	242754	627140	1.42084e+06
methylmalonic acid	C02170	3.55503e+07	2.15905e+07	8.18463e+06	6.51311e+06	4.34791e+06	7.01862e+06	3.26173e+07	0
mevalonic acid	C00418	2.3078e+07	1.77387e+07	2.35731e+07	1.94075e+07	1.78103e+06	1.52772e+06	368207	2.01249e+06
N1/N8-acetylspermidine	C00612 / C01029	18403.8	4.59273e+06	4.78524e+06	6.9148e+06	7.29959e+06	6.18125e+06	1.14665e+07	6.04522e+06
N1-acetylspermine	C02567	4.26739e+06	4.66932e+06	3.7834e+06	2.84195e+06	1.73344e+06	1.39146e+06	1.15703e+06	488498
N-acetylaspartic acid	C01042	96877.8	782819	392806	196234	14590.6	0	0	46699.5
N-acetylaspartylglutamic acid	C12270	0	0	0	0	0	0	0	0
N-acetyl-b-alanine / N-acetyl-alanine	C01073 / n/a	2.52048e+07	1.97324e+07	3.33126e+07	4.00883e+07	4.32132e+07	3.95698e+07	4.21323e+07	4.19597e+07
N-acetyl-DL-serine / O-acetyl-L-serine	n/a / C00979	1.09879e+08	8.42889e+07	1.05247e+08	1.35234e+08	1.27121e+08	1.49231e+08	1.75343e+08	1.44007e+08
N-acetylglucosamine 1/6-phosphate	C04501 / C00357	182956	0	0	0	0	0	0	0
N-acetylglycine	n/a	1.90719e+07	2.2835e+07	4.09959e+07	3.83761e+07	6.45999e+07	1.23627e+08	5.0108e+07	1.11664e+08
N-acetyl-L-glutamic acid	C00624	1.58773e+06	5.10977e+06	5.81691e+06	3.75719e+06	1.24742e+06	1.57889e+06	2.87259e+06	1.48733e+06
NAD+	C00003	209833	0	0	302406	1.56219e+06	487014	1.76837e+06	266025
NADH	C00004	1.76199e+06	3.37495e+07	2.49345e+07	6.41351e+06	407883	1.1359e+06	2.86546e+06	1.81484e+06
NADP+	C00006	3.1626e+06	2.46599e+06	2.95381e+06	3.96035e+06	3.00444e+06	3.91779e+06	3.61815e+06	3.98169e+06
NADPH	C00005	0	0	0	0	0	0	0	0
N-carbamoyl-L-aspartate	C00438	207894	152173	158647	441446	486059	1.09503e+06	908461	1.20524e+06
nebularine	C01736	0	0	0	0	0	0	0	0
N-formyl-L-methionine	C03145	9.10526e+06	1.09473e+07	5.84873e+06	1.00202e+07	1.31479e+07	1.10445e+07	1.36444e+07	1.8366e+07
nicotinamide	C00153	1.37005e+07	1.24014e+07	1.52235e+07	1.75666e+07	1.99085e+07	2.0872e+07	1.62292e+07	2.30067e+07
nicotinamide riboside+	C03150	0	0	0	0	0	0	0	0
nicotinic acid	C00253	0	0	0	0	0	0	0	0
N-methyl-alanine	C02721	2.72921e+06	2.15742e+06	2.00663e+06	4.57115e+06	2.06769e+06	2.08368e+06	9.84725e+06	5.64656e+06
N-methylaspartic acid	C12269	1.23622e+09	2.03607e+09	2.0984e+09	2.30654e+09	1.45172e+09	5.40057e+08	2.02094e+09	5.71727e+08
N-methyltryptamine	C06213	0	0	0	0	0	0	0	0
NMN	C00455	122039	56232.4	56615	335481	141942	286019	317004	254337
norepinephrine / pyridoxine	C00547 / C00314	1.3732e+08	1.4194e+08	9.7607e+07	1.28933e+08	1.30029e+08	1.49707e+08	1.53832e+08	1.81237e+08
octopamine	C04227	687039	358818	598469	382567	661559	591295	280771	239601
ornithine	C01602	1.22493e+07	9.59222e+06	9.90771e+06	9.79865e+06	1.51131e+07	1.89893e+07	1.61043e+07	1.75676e+07
orotic acid	C00295	4.59344e+06	3.22909e+06	4.42145e+06	8.01875e+06	4.06506e+06	2.68831e+06	3.86236e+06	2.8077e+06
orotidylic acid	C01103	0	0	0	0	0	0	0	0
O-succinyl-homoserine	C01118	103495	498924	523601	87507.6	0	31671	78366.3	16170.4
oxalacetic acid	C00036	0	0	0	0	0	0	0	0
pantothenic acid	C00864	5.52395e+08	2.56335e+08	3.35634e+08	5.71053e+08	4.36334e+08	1.99657e+08	4.94603e+08	2.40779e+08
phenethylamine	C05332	0	0	0	0	0	0	0	0
phenylalanine	C02057	4.92924e+08	7.69839e+08	8.08001e+08	6.2739e+08	4.40039e+08	5.16163e+08	5.68268e+08	5.25739e+08
phenylephrine / synephrine	C07441 / C04548	639746	397185	471059	236124	332394	295733	313531	210468
phenylethanolamine	C02735	0	0	0	0	0	0	0	0
phosphocreatine	C02305	0	0	0	0	0	0	0	0
phosphoenolpyruvate	C00074	0	554289	362626	0	0	1.03154e+06	391873	1.73101e+06
phosphorylcholine+	C00588	1.79765e+09	1.37767e+09	2.04775e+09	2.2645e+09	2.75385e+09	3.84747e+09	4.0739e+09	4.66023e+09
picolinic acid	C10164	1.04351e+07	3.54904e+06	5.49006e+06	3.83505e+06	4.02585e+06	4.49126e+06	4.94869e+06	3.98953e+06
proline	C16435	3.86638e+09	2.60978e+09	3.19045e+09	3.78326e+09	3.11396e+09	4.1935e+09	3.87829e+09	4.27566e+09
propionic acid	C00163	0	0	0	0	0	0	0	0
PRPP	C00119	0	0	0	0	0	0	14889.8	0
pseudouridine	C02067	90196.9	265326	93291.2	0	135709	139675	88412.8	50352.7
purine	C15587	0	0	0	0	0	0	0	0
putrescine	C00134	9.2083e+06	4.30292e+06	1.75152e+08	1.49069e+08	2.05506e+08	2.00974e+08	1.82031e+08	2.07202e+08
pyridoxal	C00250	9.40053e+06	5.5191e+06	5.40321e+06	6.16245e+06	7.10394e+06	8.69932e+06	6.07585e+06	1.08348e+07
pyroglutamic acid	C01879-C02237	4.79004e+08	3.54152e+08	3.94856e+08	5.69128e+08	7.3048e+08	1.02228e+09	7.58958e+08	1.19874e+09
pyrroline hydroxycarboxylic acid	C04281	3.80159e+08	4.88143e+08	4.98345e+08	5.58382e+08	3.76977e+08	1.72917e+08	4.70973e+08	1.8807e+08
pyruvic acid	C00022	1.15742e+08	8.76627e+07	9.67492e+07	1.26156e+08	1.02371e+08	1.12026e+08	1.05292e+08	1.30397e+08
quinolinic acid	C03722	0	51812	84812.7	0	0	0	509.637	0
S-adenosyl-L-homocysteine	C00021	0	140610	260669	329260	0	0	147525	0
S-adenosyl-L-methionine+	C00019	3.56331e+07	2.28107e+07	2.87937e+07	4.14302e+07	5.27438e+07	6.60296e+07	6.28528e+07	7.501e+07
S-adenosylmethioninamine+	C01137	0	18868.8	25180.5	21982.4	41275.5	8392.22	8423.95	7604.31
SAICAR	C04823	0	0	0	0	0	0	0	0
sarcosine	C00213	1.36748e+06	320640	1.36793e+06	298394	4.07224e+06	861124	378941	7.81393e+06
serine	C00716	7.59024e+06	2.37004e+07	2.20651e+07	1.28044e+07	6.33361e+06	4.80174e+06	6.80363e+06	5.36769e+06
serotonin	C00780	14325.2	132510	81328.4	31651.2	96653.3	58637.6	35064.5	157808
sorbitol / galactitol / L-iditol / manitol	C00794 / C01697 / C01507 / C00392	3.66762e+07	3.31614e+07	3.18851e+07	4.45015e+07	3.98984e+07	5.66491e+07	4.97596e+07	5.63598e+07
spermidine	C00315	7.47802e+08	9.6378e+08	7.95088e+08	6.38135e+08	5.53397e+08	4.54725e+08	3.99893e+08	3.27676e+08
spermine	C00750	2.32621e+07	2.93465e+07	2.37956e+07	2.2941e+07	1.93004e+07	1.70893e+07	1.95265e+07	1.5392e+07
succinic acid	C00042	8.78725e+07	1.2705e+08	1.45921e+08	1.87e+08	7.69877e+07	1.28729e+07	1.73129e+08	1.41004e+07
succinic semialdehyde	C00232	890516	1.98301e+07	8.43812e+06	406724	1.76547e+06	4.40866e+06	1.6546e+06	804949
succinyl-CoA	C00091	0	0	0	0	0	0	0	0
sucrose	C00089	129184	0	0	0	0	0	0	0
taurine	C00245	4.74646e+08	3.40638e+08	4.26901e+08	5.34708e+08	4.75698e+08	6.12182e+08	5.60003e+08	6.2424e+08
thiamine diphosphate+	C00068	1.10852e+06	816506	1.13256e+06	1.36863e+06	810229	1.02318e+06	1.06582e+06	1.20876e+06
thiamine phosphate+	C01081	0	0	9041.59	11653.7	0	0	0	0
thiamine+	C00378	1.89546e+08	1.36726e+08	1.13709e+08	1.14989e+08	2.33289e+08	3.80403e+08	2.53265e+08	3.64985e+08
thymidine	C00214	208104	378004	174665	156815	713226	267385	187158	370935
thymine	C00178	0	0	0	0	0	0	0	0
tryptamine	C00398	78781.9	41847.3	59305.1	42588.9	43687	87242.9	35220	14404.4
tryptophan	C00806	8.00325e+07	1.27287e+08	1.27301e+08	9.71627e+07	4.78467e+07	5.79177e+07	5.9597e+07	5.74006e+07
tyramine	C00483	0	422653	298021	624859	652535	165788	333568	71082.9
tyrosine	C01536	3.94418e+08	2.70227e+08	3.13226e+08	4.17306e+08	3.82367e+08	5.38244e+08	4.56872e+08	5.18913e+08
UDP	C00015	119775	1.7162e+06	2.15687e+06	1.6844e+06	0	0	0	0
UDP-D-galactose / UDP-D-glucose	C00052 / C00029	2.24905e+06	1.75825e+06	2.10329e+06	2.97657e+06	1.89584e+06	2.57853e+06	2.11081e+06	2.55577e+06
UDP-N-acetyl-galactosamine/UDP-N-acetyl-glucosamine	C00203 / C00043	0	273944	0	0	191136	234106	1.00827e+06	393368
UMP	C00105	0	0	0	140636	0	0	0	329793
uracil	C00106	637440	1.18475e+06	940757	1.99346e+06	880074	845372	433021	679943
uracil 5-carboxylic acid	C03030	0	0	0	0	0	0	0	0
urea	C00086	0	0	0	0	0	0	0	0
uric acid	C00366	4.05942e+06	3.07766e+06	2.45277e+06	2.65559e+06	2.33202e+06	3.90033e+06	2.67704e+06	3.69751e+06
uridine	C00299	1.41374e+06	1.81746e+06	843420	2.59741e+06	1.55391e+06	1.4812e+06	1.23696e+06	2.30851e+06
UTP	C00075	1.47634e+07	1.16033e+07	1.46851e+07	1.74523e+07	1.98787e+07	2.08559e+07	2.47967e+07	2.84074e+07
valine / norvaline	C16436 / C01799	2.8369e+08	2.43552e+08	2.82424e+08	3.5006e+08	3.2255e+08	5.71661e+08	3.71416e+08	4.29133e+08
vitamin B2	C00255	98686.3	190257	51703.1	162306	31949.1	27828.9	135468	46749.6
xanthine	C00385	334777	567152	266309	225038	335914	506950	284433	435524
xanthosine	C01762	0	0	0	0	0	0	0	0
xanthurenic acid	C02470	0	0	0	10846.1	0	0	0	0
XMP	C00655	0	0	0	0	0	0	0	0
xylitol / arabitol / ribito	C00379/ C01904 / C00532 / C00474	7.52292e+06	4.64844e+06	4.74407e+06	7.28015e+06	5.76291e+06	4.92141e+06	7.06717e+06	6.73934e+06
y-glutamylcysteine	C00669	90544.2	788317	645089	290030	259352	257780	392705	301604
